# Supplementary material for: Self-assembling ultrashort NSAID-peptide nanosponges: multifunctional antimicrobial and anti-inflammatory materials
Source: Royal Society of Chemistry journal article supplement (doi:10.1039/c6ra20282a), 2016-01-01
Supplement: c6ra20282a1.pdf [file c6ra20282a1.pdf]

## Supporting Information

### Self-assembling Ultrashort NSAID-Peptide Nanosponges: Multifunctional Antimicrobial and Anti-inflammatory Materials

Alice P. McCloskey, Sophie M. Gilmore, Jie Zhou, Emily R. Draper, Simon Porter, Brendan F. Gilmore, Bing Xu, Garry Laverty\*

Ibuprofen-L-phenylalanine-L-phenylalanine-L-Lysine-L-Lysine-COOH (IbuFFKK).  $^1\text{H}$  NMR (400 MHz, DMSO- $d_6$ ,  $\delta$ ): 8.21-8.02 (m,  $J = 4.06$ , 4H; NH), 7.66 (s,  $J = 4.13$ , 4H; NH<sub>2</sub>), 7.25-6.99 (m,  $J = 14.26$ , 14H; Ar H), 4.57-4.18 (m,  $J = 4.40$ , 4H, CHNH), 3.03 (q,  $J = 1.08$ , 1H; CHCH<sub>3</sub>), 2.84-2.68 (m,  $J = 10.75$ , 8H; CH<sub>2</sub>Ar, 2H; CH<sub>2</sub>NH<sub>2</sub>), 2.39 (d,  $J = 3.23$ , 3H; CH<sub>3</sub>), 1.54-1.07 (m,  $J = 17.54$ , 2H; Ar CH<sub>2</sub>CH(CH<sub>3</sub>)<sub>2</sub>, 1H; CH<sub>2</sub>CH(CH<sub>3</sub>)<sub>2</sub>, 12H; CH<sub>2</sub>), 0.86-0.83 (m,  $J = 6.51$ , 6H; CH<sub>3</sub>). EIMS  $m/z$  (%): 756.46 (100) [M<sup>+</sup>], 757.46 (46.5) [M<sup>+</sup> + H]<sup>+</sup>, 758.46 (10.6) [M<sup>+</sup> + 2H]<sup>+</sup>; (ESI)  $m/z$ : [M + H]<sup>+</sup> calcd for C<sub>43</sub>H<sub>60</sub>N<sub>6</sub>O<sub>6</sub>, 756.99; found, 756.46.

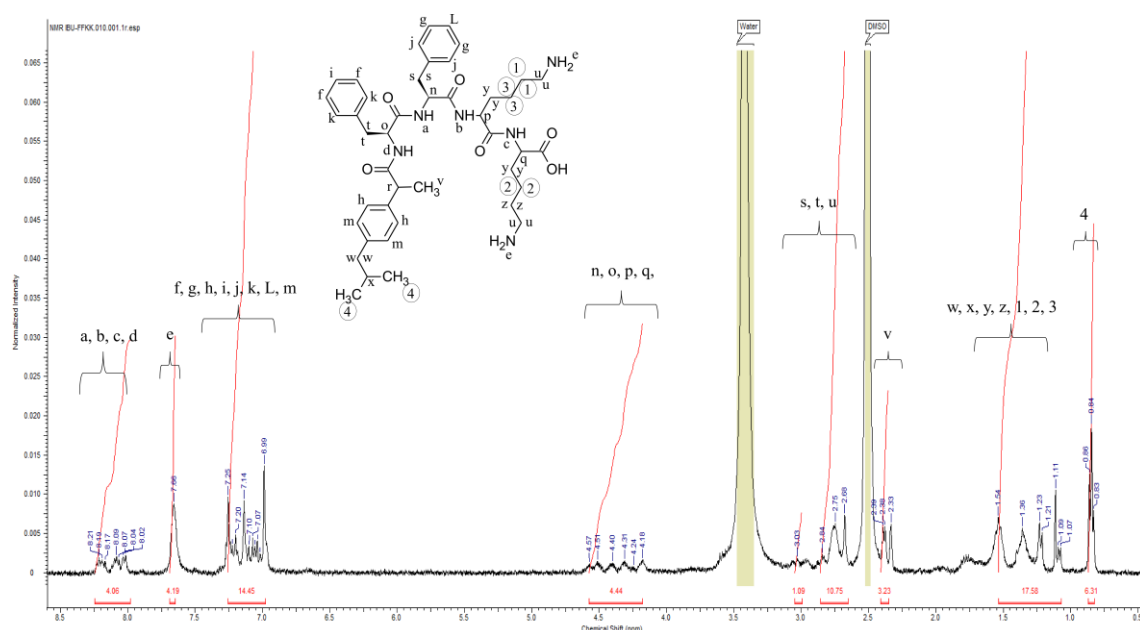

**Figure S1.**  $^1\text{H}$  NMR spectra for IbuFFKK (C<sub>2</sub>D<sub>6</sub>OS, TMS standard, 400MHz).

Indomethacin-L-phenylalanine-L-phenylalanine-L-Lysine-L-Lysine-COOH (IndFFKK).

$^1\text{H}$  NMR (400 MHz, DMSO- $d_6$ ,  $\delta$ ): 8.21-8.16 (m,  $J = 2.59$ , 1H; NH, 1H; Ar H), 7.63-7.55 (m,  $J = 4.16$ , 1H; Ar H, 2H; NH), 7.22-6.62 (m,  $J = 17.33$ , 14H; Ar H, 1H; NH, 4H; NH<sub>2</sub>), 4.56-

4.16 (m,  $J = 5.49$ , 4H; CHNH), 3.74-3.67 (m,  $J = 4.41$ , 3H; CH<sub>3</sub>, 2H; CH<sub>2</sub>CO), 3.03-2.68 (m,  $J = 14.50$ , 4H; CH<sub>2</sub>NH<sub>2</sub>, 4H; CH<sub>2</sub> Ar), 2.33 (s,  $J = 3.02$ , 3H; CH<sub>3</sub>), 1.89-1.24 (m,  $J = 21.08$ , 12H; CH<sub>2</sub>). EIMS  $m/z$  (%): 893.39 (100) [M<sup>+</sup>], 894.39 (51.9) [M<sup>+</sup> – H], 895.38 (32) [M<sup>+</sup> – 2H], 896.39 (16.6); (ESI)  $m/z$ : [M + H]<sup>+</sup> calcd for C<sub>49</sub>H<sub>58</sub>ClN<sub>7</sub>O<sub>8</sub>, 894.47; found, 893.39.

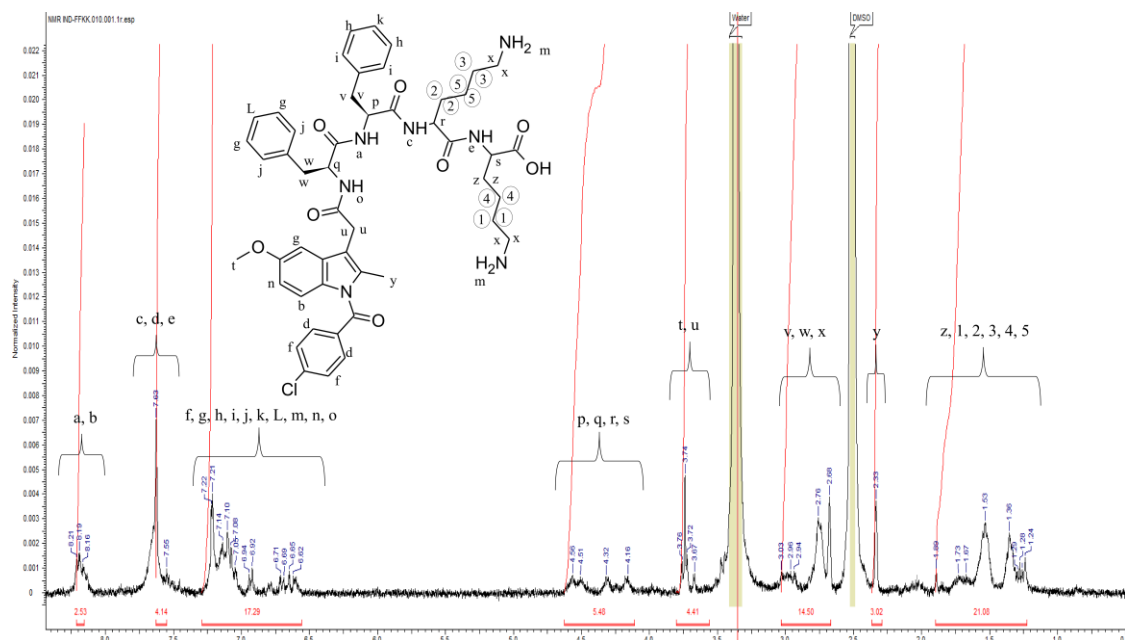

**Figure S2.** <sup>1</sup>H NMR.spectra for IndFFKK (C<sub>2</sub>D<sub>6</sub>OS, TMS standard, 400MHZ).

Naproxen-L-phenylalanine-L-phenylalanine-L-Lysine-L-Lysine-COOH (NpxFFKK).

<sup>1</sup>H NMR (400 MHz, DMSO-*d*<sub>6</sub>, δ): 8.22-8.04 (m,  $J = 5.53$ , 3H; NH, 2H; Ar H), 7.75-7.05 (m,  $J = 21.43$ , 14H; Ar H, 4H; NH<sub>2</sub>), 4.50-3.71 (m,  $J = 6.20$ , 4H; CHNH, 1H; Ar CHCH<sub>3</sub>), 2.98-2.68 (m,  $J = 9.97$  4H; Ar CH<sub>2</sub>, 4H; CH<sub>2</sub>NH<sub>2</sub>), 2.33 (s,  $J = 3.10$ , 3H; CH<sub>3</sub>), 1.73-1.03 (m,  $J = 21.71$ , 12H; CH<sub>2</sub>, 3H; CH<sub>3</sub>). EIMS  $m/z$  (%): 780.42 (100) [M<sup>+</sup>], 781.42 (47.6) [M<sup>+</sup> – H], 782.43 (11.1) [M<sup>+</sup> – 2H]; (ESI)  $m/z$ : [M + H]<sup>+</sup> calcd for C<sub>44</sub>H<sub>56</sub>N<sub>6</sub>O<sub>7</sub>, 780.97; found, 780.42.

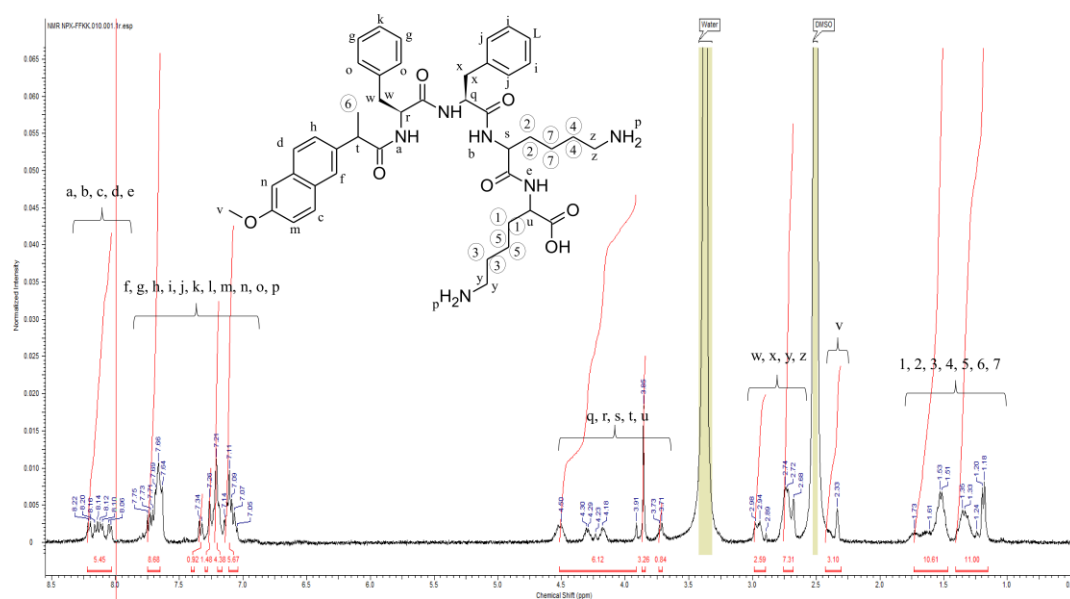

**Figure S3.**  $^1\text{H}$  NMR spectra for NpxFFKK ( $\text{C}_2\text{D}_6\text{OS}$ , TMS standard, 400MHz).

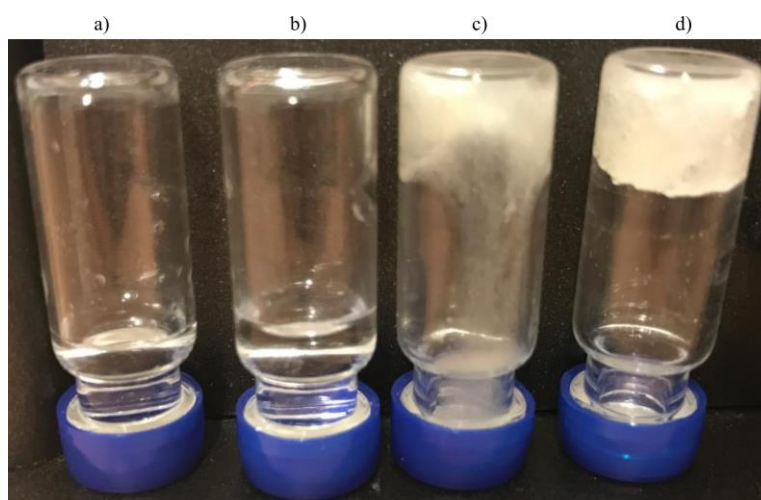

**Figure S4.** Gel inversion assay for IbuFFKK pH 7.4,  $\text{H}_2\text{O}$  primary vehicle. a) 0.5% w/v, b) 1.0% w/v, c) 1.5% w/v, d) 2.0% w/v.

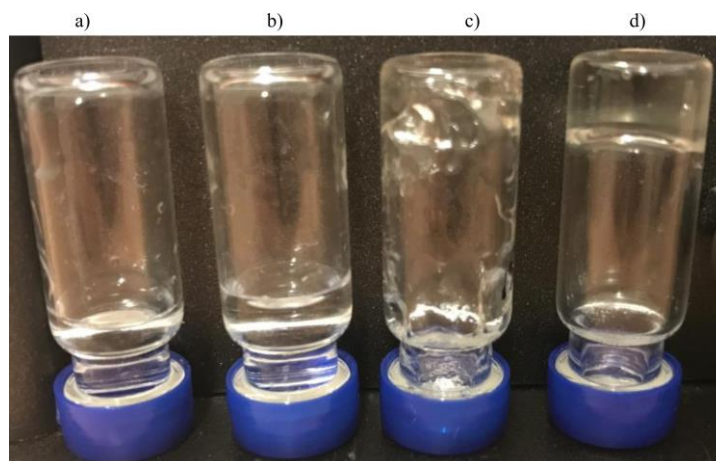

**Figure S5.** Gel inversion assay for IbuFFKK pH 7.4,  $\text{D}_2\text{O}$  primary vehicle, a) 0.5% w/v, b) 1.0% w/v, c) 1.5% w/v, d) 2.0% w/v.

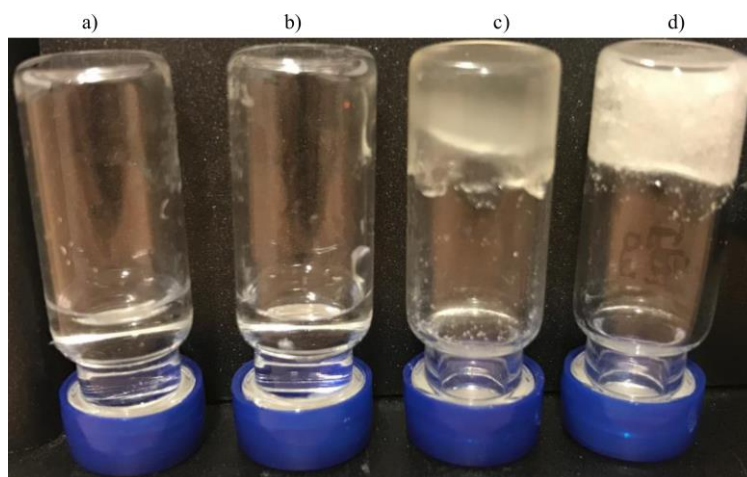

**Figure S6.** Gel inversion assay for IndFFKK pH 7.4, H<sub>2</sub>O primary vehicle, a) 0.5% w/v, b) 1.0% w/v, c) 1.5% w/v, d) 2.0% w/v.

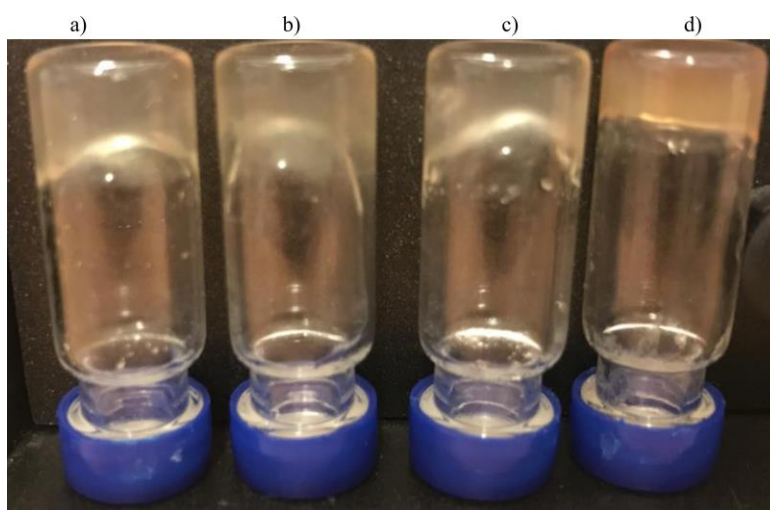

**Figure S7.** Gel inversion assay for NpxFFKK pH 7.4, H<sub>2</sub>O primary vehicle, a) 0.5% w/v, b) 1.0% w/v, c) 1.5% w/v, d) 2.0% w/v

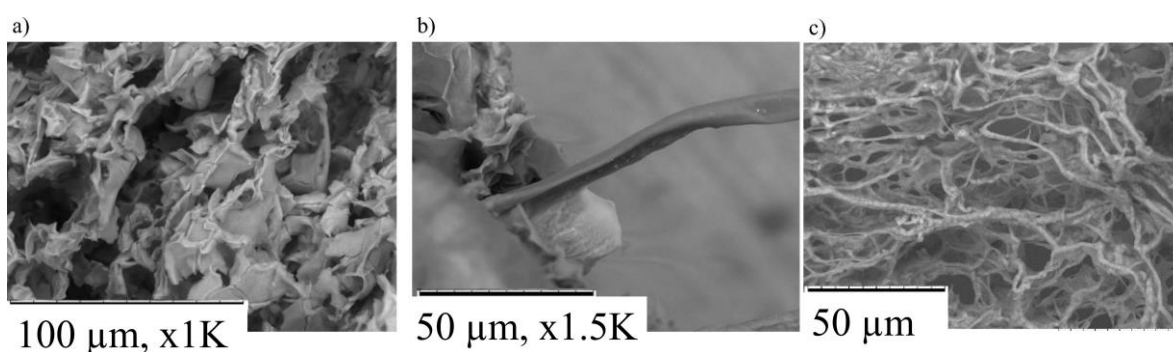

**Figure S8.** Cryo-SEM images of 2% w/v (a) IbuFFKK (D<sub>2</sub>O), (b) IndFFKK (H<sub>2</sub>O), (c) NpxFFKK (H<sub>2</sub>O).

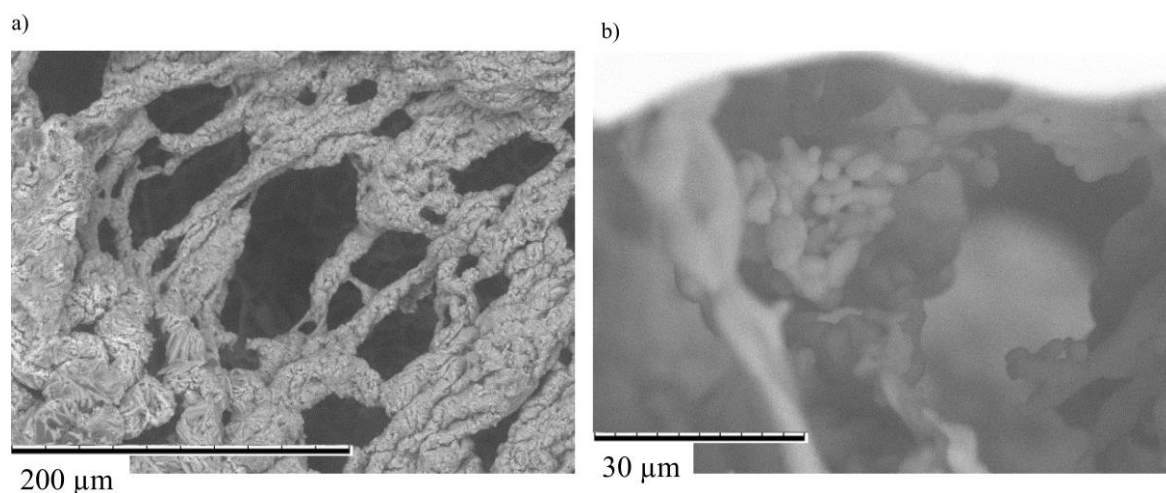

**Figure S9.** Cryo-SEM images of 2% w/v IbuFFKK (H<sub>2</sub>O primary vehicle).

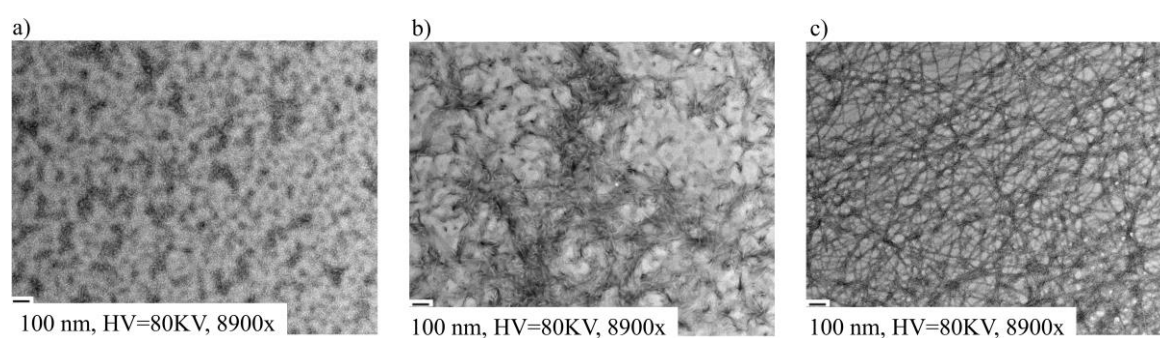

**Figure S10.** TEM images of 2% w/v (8900x) (a) IbuFFKK (D<sub>2</sub>O), (b) IndFFKK (H<sub>2</sub>O), (c) NpxFFKK (H<sub>2</sub>O).

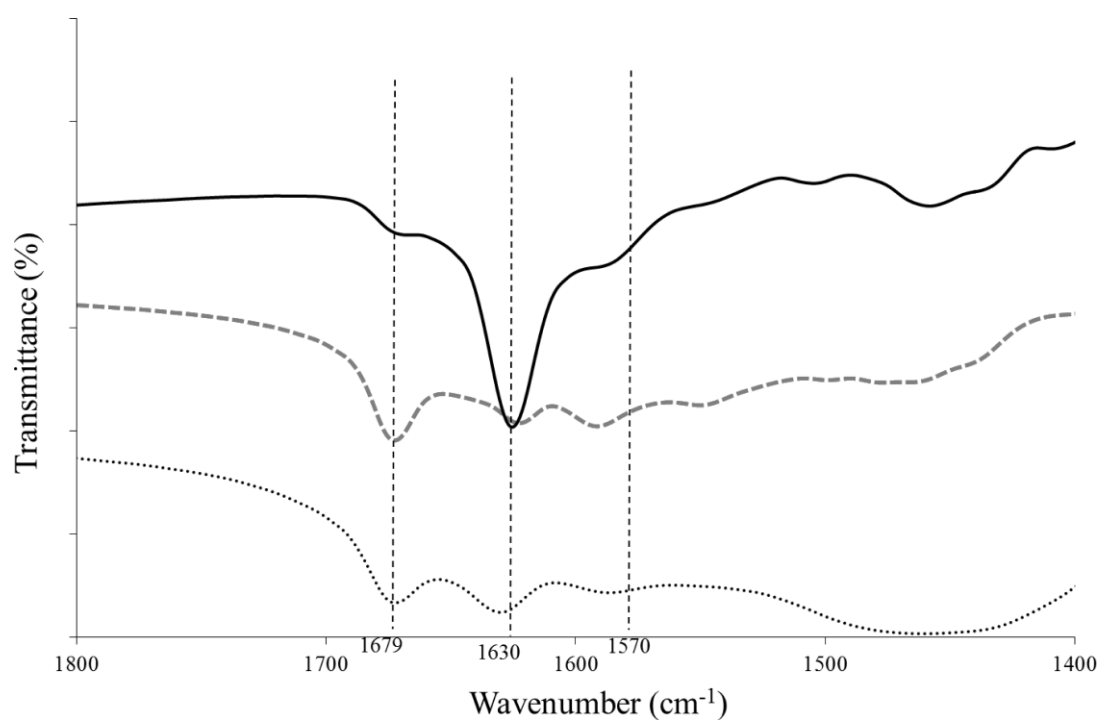

**Figure S11.** FTIR spectra displaying amide band of 2% w/v NSAID-peptides in deuterated solvents. Key: dotted line: IbuFFKK, dashed line: IndFFKK, full line: NpxFFKK.

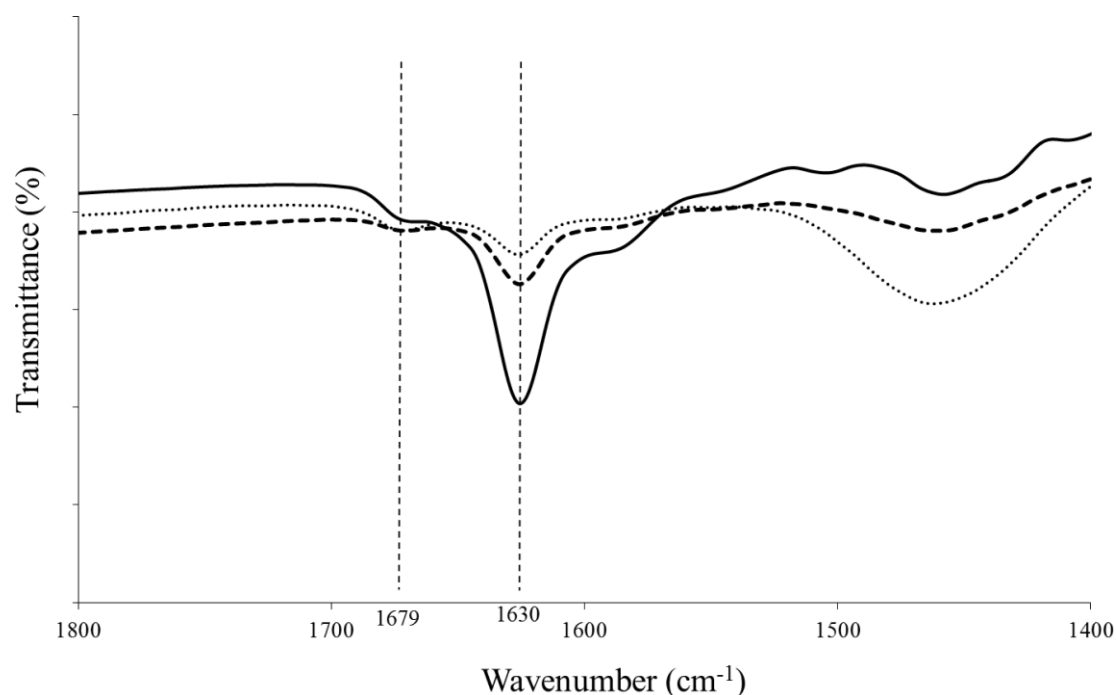

**Figure S12.** FTIR spectra displaying amide band of 0.5-2% w/v NpxFFKK peptide. Key: dotted line: 0.5% w/v, dashed line: 1.5% w/v, full line: 2% w/v.

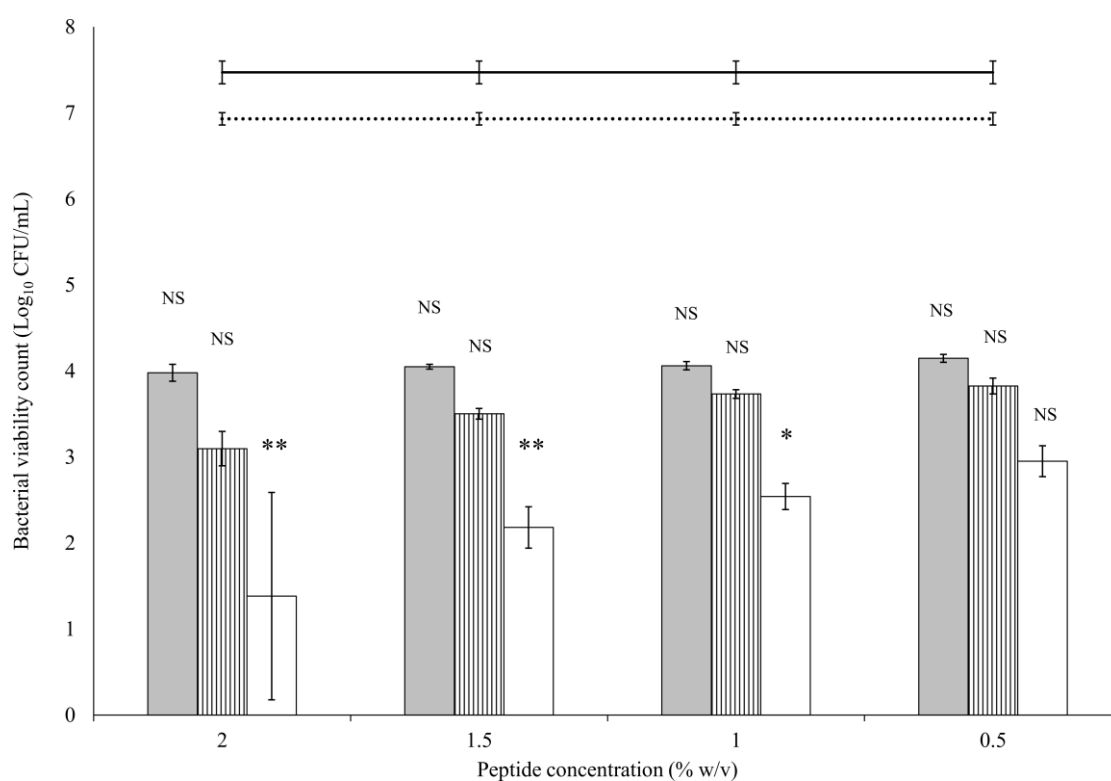

**Figure S13.** Logarithmic reduction in *S. epidermidis* (ATCC 35984) viable count (Log<sub>10</sub> CFU/mL) after 24 hour incubation with varying concentrations of NSAID-peptides. Results are displayed as a mean of six replicates. Key: grey column: IbuFFKK, striped column: IndFFKK, white column: NpxFFKK, dotted line: PBS control, black line: 2% w/v HPMC control. NS: no significant difference ( $P \geq 0.05$ ), \*:  $P < 0.05$ , \*\*:  $P < 0.01$  significant difference between Log<sub>10</sub> CFU/mL of NSAID-peptide and the negative control (PBS).

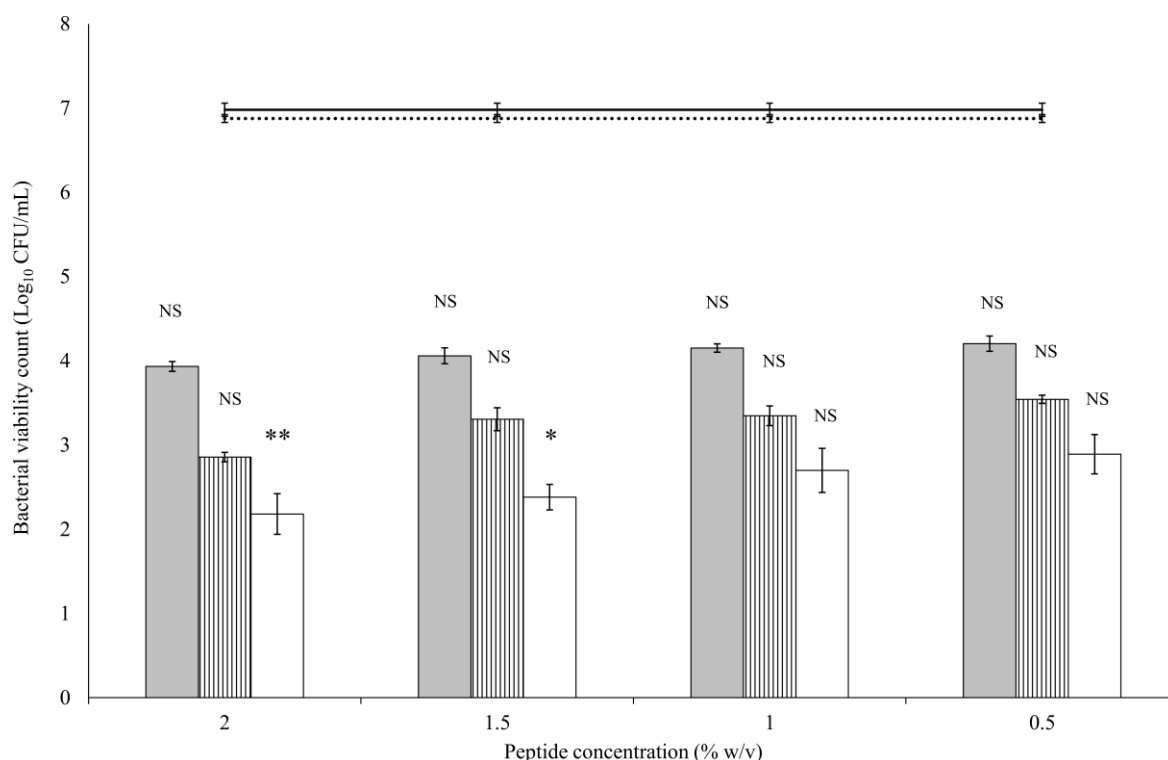

**Figure S14.** Logarithmic reduction in *E. coli* (ATCC 11303) viable count (Log<sub>10</sub> CFU/mL) after 24 hour incubation with varying concentrations of NSAID-peptides. Results are displayed as a mean of six replicates. Key: grey column: IbuFFKK, striped column: IndFFKK, white column: NpxFFKK, dotted line: PBS control, black line: 2% w/v HPMC control. NS: no significant difference ( $P \geq 0.05$ ), \*:  $P < 0.05$ , \*\*:  $P < 0.01$  significant difference between Log<sub>10</sub> CFU/mL of NSAID-peptide and the negative control (PBS).

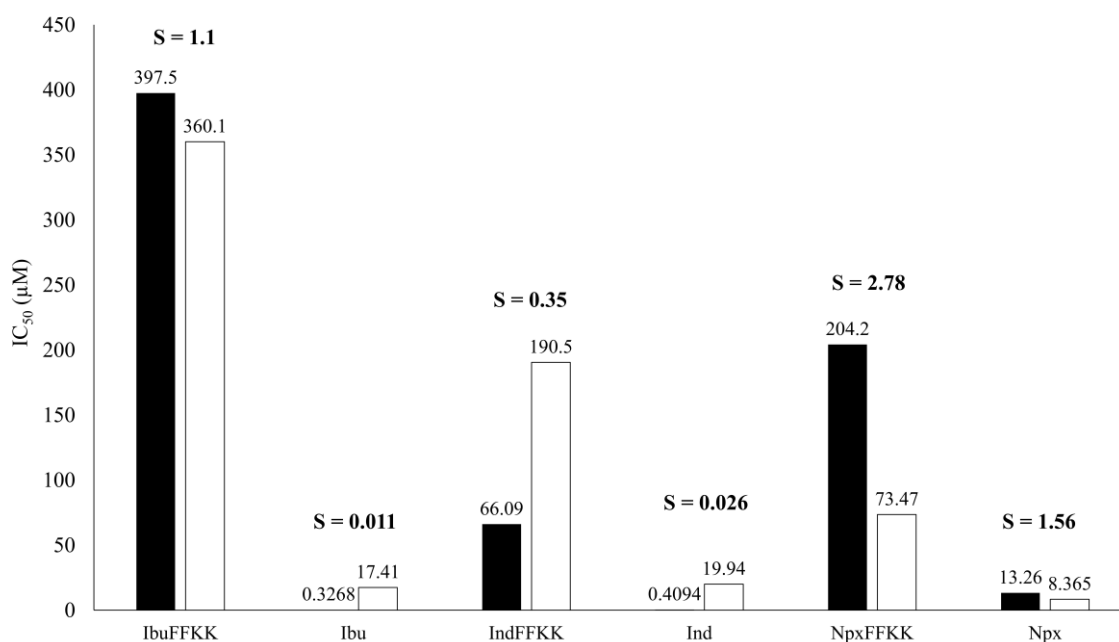

**Figure S15.** IC<sub>50</sub> values of NSAID-peptide and NSAIDs only molecules corresponding to inhibition of COX-1 (black column) and COX-2 (white column) enzymes. Selectivity (S) is defined as the ratio of the IC<sub>50</sub> values relative to COX-1: COX-2.

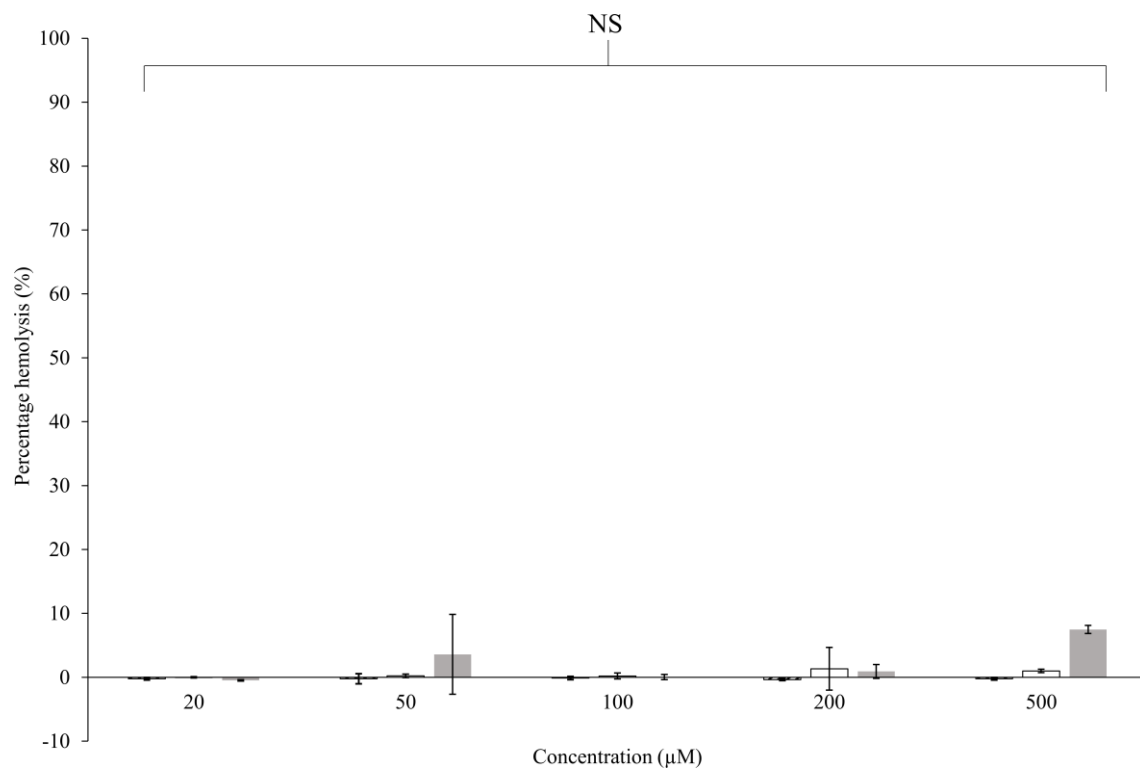

**Figure S16.** Percentage hemolysis of equine erythrocytes after 1 hour exposure to varying concentrations of NSAID-peptides. Key: striped: IbuFFKK, white: IndFFKK, grey: NpxFFKK, NS: no significant difference ( $P \geq 0.05$ ) between the NSAID-peptide and the negative control (PBS).

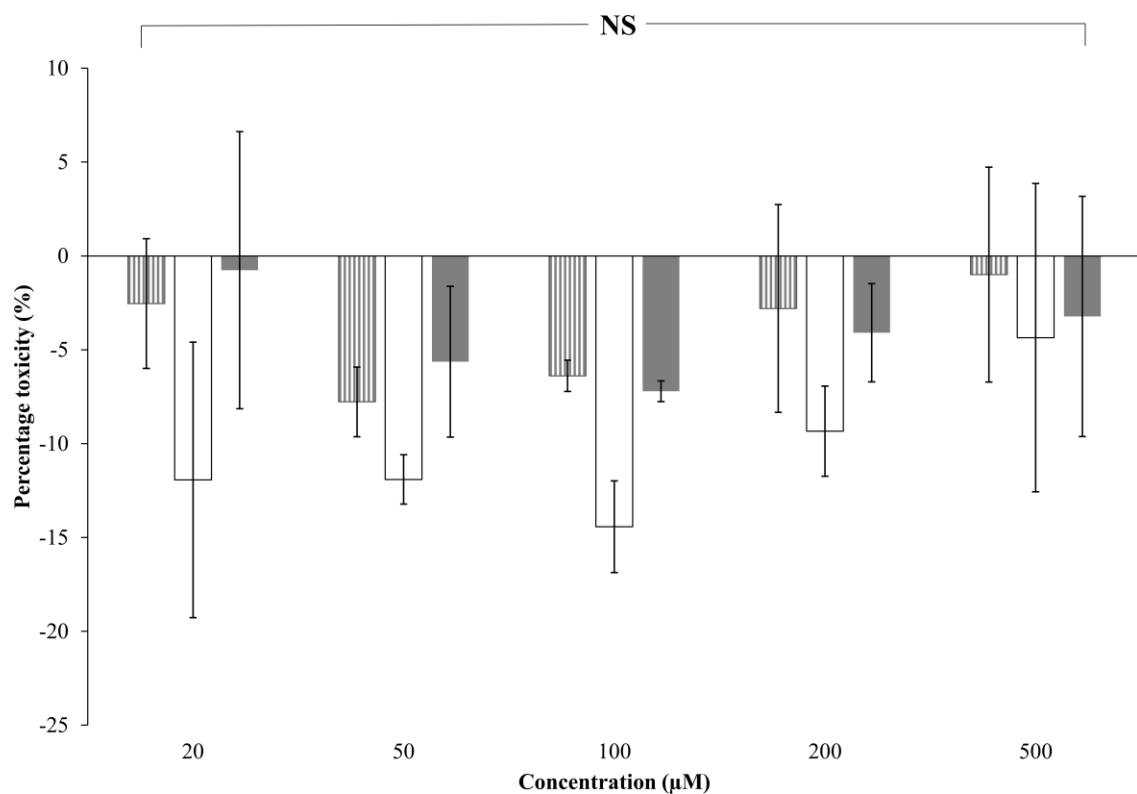

**Figure S17.** Percentage toxicity of NCTC clone 929 (ATCC CCL 1) cells after 24 hour exposure to varying concentrations of NSAID-peptides. Toxicity is calculated by quantifying

LDH release. Key: striped: IbuFFKK, white: IndFFKK, grey: NpxFFKK, ns: no significant difference ( $P \geq 0.05$ ) between the NSAID-peptide and the negative control (PBS).

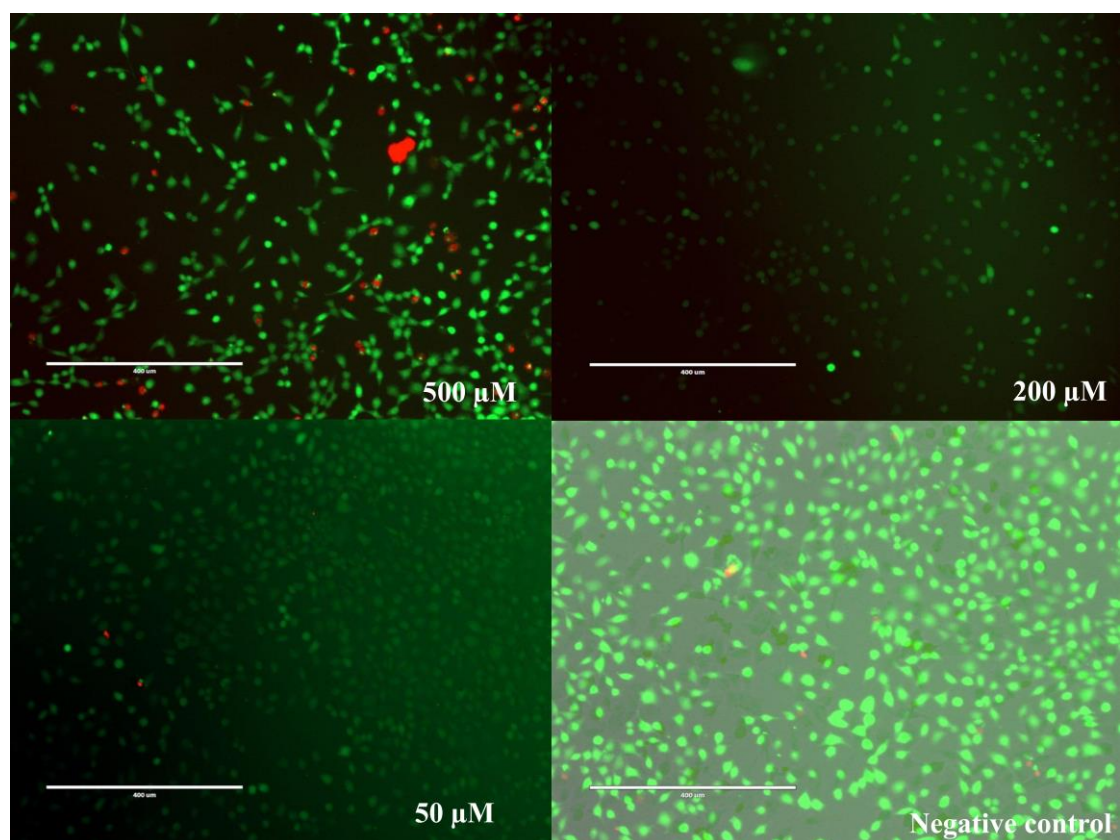

**Figure S18.** LIVE/DEAD® stain results of NCTC 929 cells after 24 hours incubation with IbuFFKK. Scale bar represents 400 μm, green staining indicates live cells, red staining indicates dead cells.

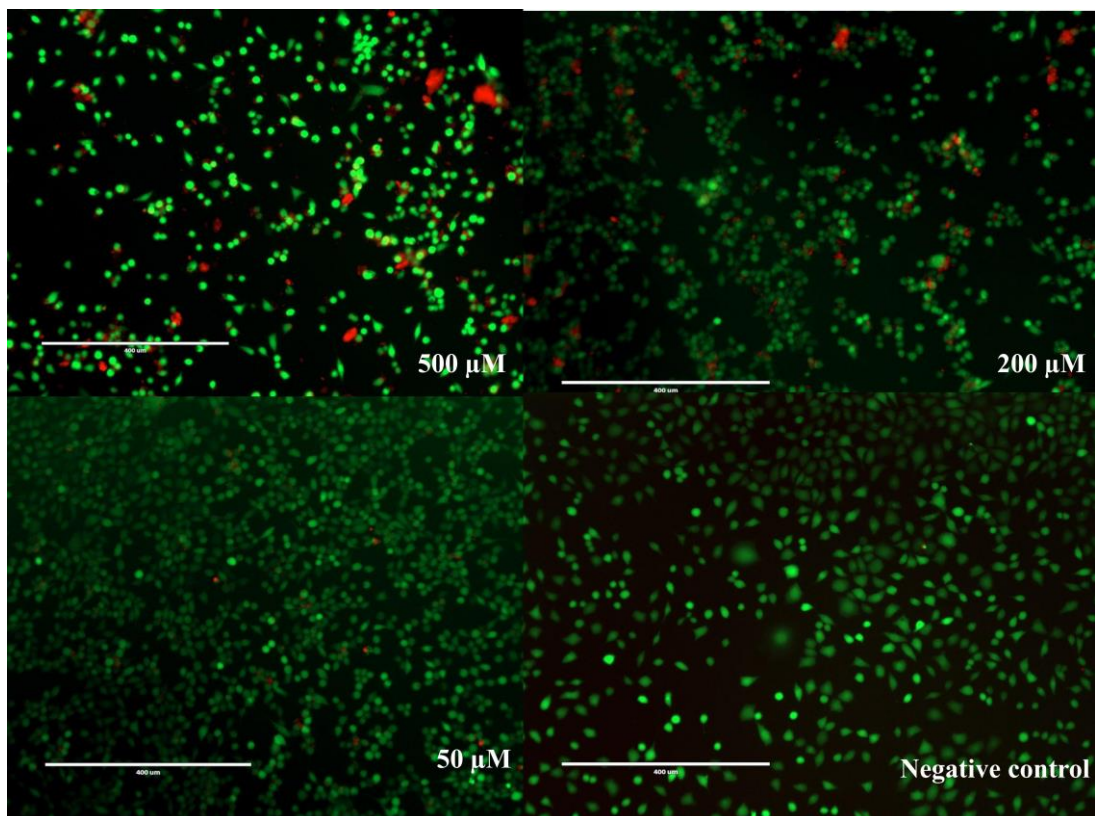

**Figure S19.** LIVE/DEAD® stain results of NCTC 929 cells after 24 hours incubation with IndFFKK. Scale bar represents 400  $\mu\text{m}$ , green staining indicates live cells, red staining indicates dead cells.

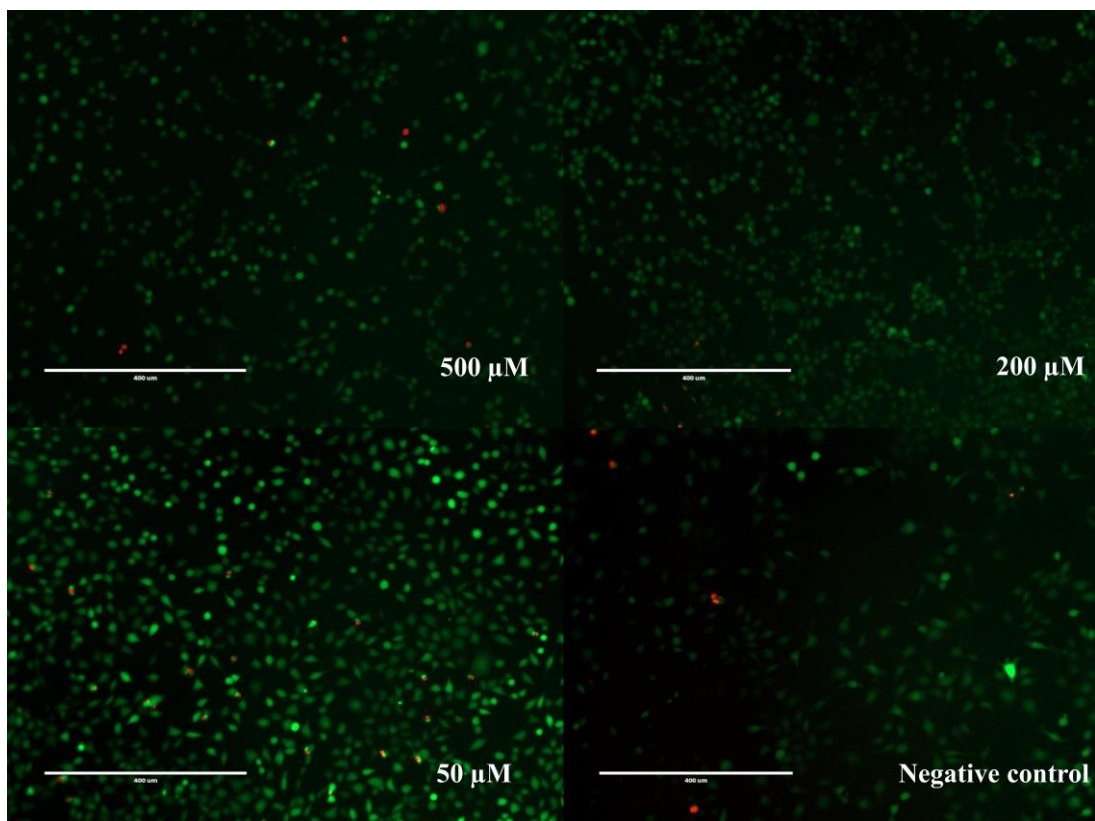

**Figure S20.** LIVE/DEAD® stain results of NCTC 929 cells after 24 hours incubation with NpxFFKK. Scale bar represents 400  $\mu\text{m}$ , green staining indicates live cells, red staining indicates dead cells.

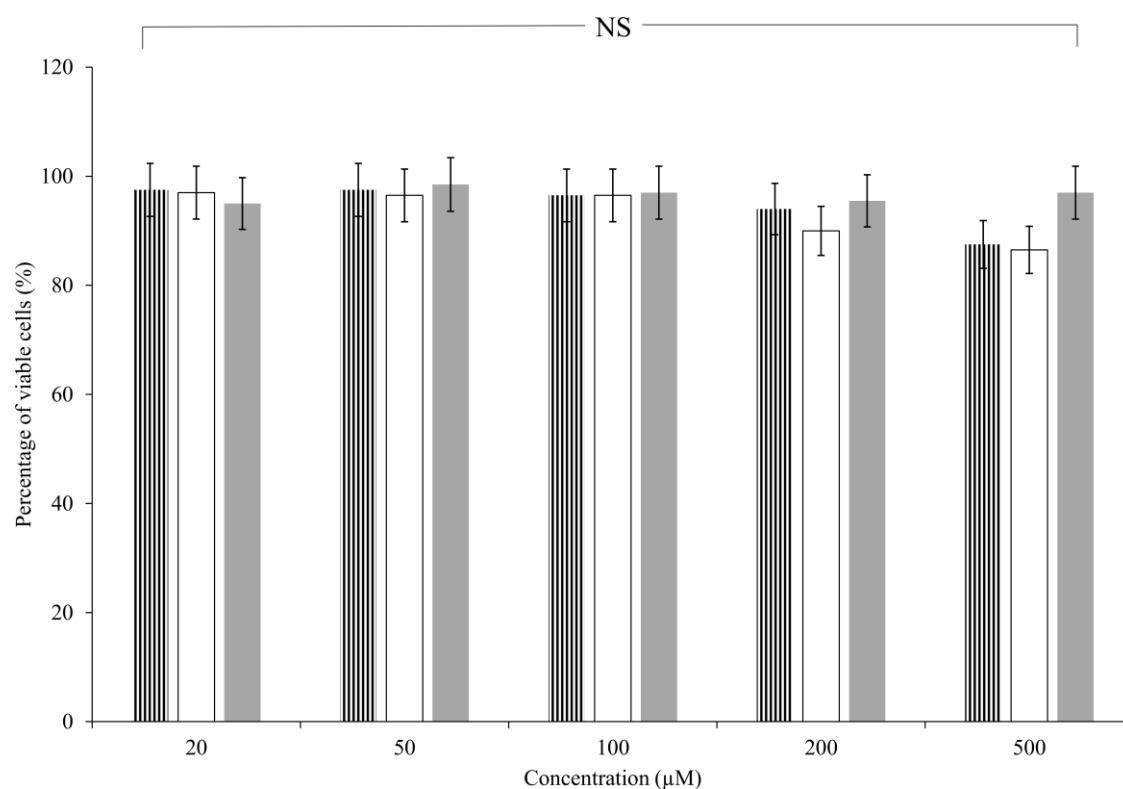

**Figure S21.** Quantitative cell counting analysis of LIVE/DEAD® stain after 24 hour exposure to varying concentrations of NSAID-peptides. Key: striped: IbuFFKK, white: IndFFKK, grey: NpxFFKK, ns: no significant difference ( $P \geq 0.05$ ) between the NSAID-peptide and the negative control (PBS).
